# Supplementary material for: Synthesis of aluminananosheetsvia supercritical fluid technology with high uranyl adsorptive capacity
Source: Royal Society of Chemistry journal article supplement (doi:10.1039/c2nj40514h), 2012-10-22
Supplement: c2nj40514h.pdf [file c2nj40514h.pdf]

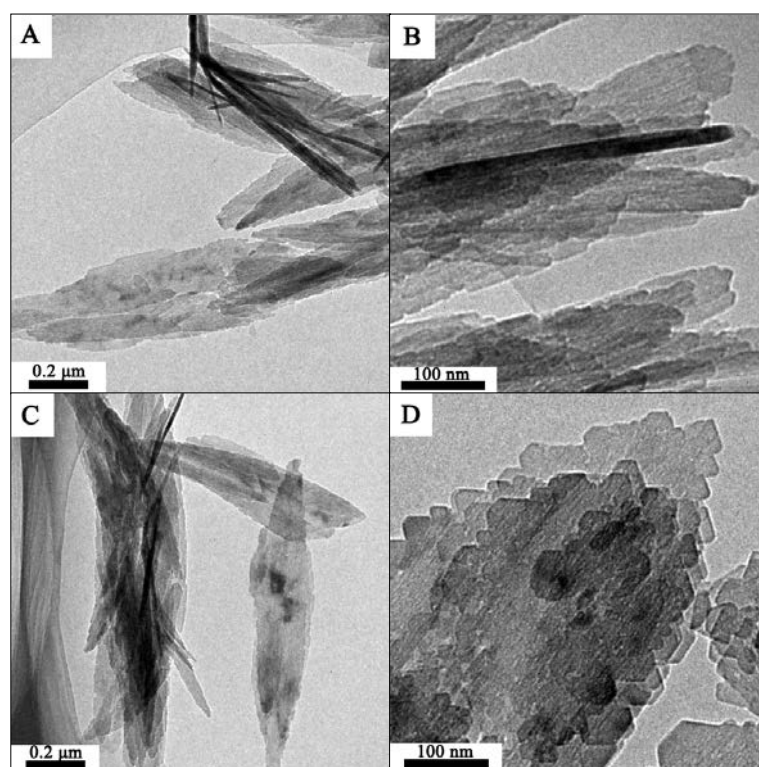

**Figure S1.** TEM images of as-synthesized AlOOH precursor for 6 h and its calcined product: (A, B) AlOOH , (C, D) Al<sub>2</sub>O<sub>3</sub>.

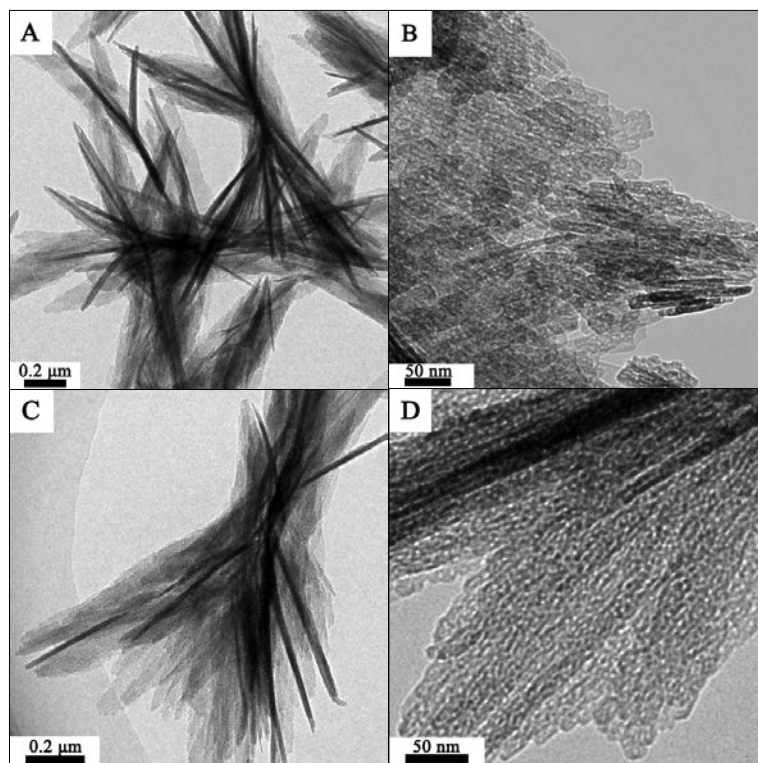

**Figure S2.** TEM images of as-synthesized AlOOH precursor for 48 h and its calcined product: (A, B) AlOOH , (C, D) Al<sub>2</sub>O<sub>3</sub>.
